# Supplementary material for: Vibrational Spectroscopy, Quantum Computational and Molecular Docking Studies on 2-[(1H-Benzimidazol-1-yl)-methyl]benzoic Acid
Source: MDPI journal article supplement (doi:10.3390/cryst12030337), 2022-02-28
Supplement: s1 [file s1]

# Vibrational Spectroscopy, Quantum Computational and Molecular Docking Studies on 2-[(1H-benzimidazol-1-yl)-methyl]benzoic acid

Ghazala Khanum <sup>1,†</sup>, Arif Ali <sup>2,†</sup>, Sadiya Shabbir <sup>2</sup>, Aysha Fatima <sup>1</sup>, Norah Alsaiani <sup>3,\*</sup>, Yasmeen Fatima <sup>2</sup>, Musheer Ahmad <sup>2,\*</sup>, Nazia Siddiqui <sup>4,\*</sup>, Saleem Javed <sup>5,\*</sup> and Mayank Gupta <sup>6</sup>

<sup>1</sup> S.O. S in Chemistry, Jiwaji University, Gwalior 474011, India

<sup>2</sup> Department of Applied Chemistry, ZHCET, Faculty of Engineering and Technology, Aligarh Muslim University, Aligarh 202002, India

<sup>3</sup> Department of Chemistry, College of Science, Princess Nourah bint Abdulrahman University, P. O. Box 84428, Riyadh 11671, Saudi Arabia

<sup>4</sup> USIC, Dayalbagh Educational Institute, Agra 282005, India

<sup>5</sup> Department of Chemistry, Institute of H. Science, Khandari, Dr. Bhimrao Ambedkar University, Agra 282002, India

<sup>6</sup> Institute of Nano Science and Technology, Sector-81, Mohali-140306, India

\* Correspondence: nsalsaiari@pnu.edu.sa (N.A.); amusheer4@gmail.com (M.A.); dr.naazsiddiqui@gmail.com (N.S.); saleem.7javed@gmail.com (S.J.)

† These authors contributed equally to this work.

To obtain a thorough understanding of optimized parameters, quantum chemical density functional calculations were carried out at the Becke3-Lee-Yang-parr (B3LYP) [20] level using 6-311++G(d,p) basis set using Gaussian 09W [21] computer package, same method was applied in one of our article DFT study on thiophene derivative [22]. The Gaussian 09W programme was used to calculate vibrational frequencies and IR intensities using the optimized molecular structure. The VEDA program was used to assign hypothetical vibrational assignments to the 21HBMBA molecule using potential energy distribution (PED) [23]. The <sup>1</sup>H NMR chemical shifts were calculated using the Gauge-Independent Atomic Orbital (GIAO) technique using the B3LYP/6-311++G(d,p) basis set since the geometry of the molecule containing Tetra Methyl Silane (TMS) was fully optimized. The title compound optimized geometry was then employed to conduct a natural bond orbital (NBO) study. Atoms in molecule (AIM) theory were used to calculate topological parameter, electron localization function using Multiwfn software [24]. The Gauss View 6 program [9] was used to create an optimum geometry MEP diagram for the 21HBMBA molecule. The theoretical UV-Vis spectra for DCM, DMSO, EtOH, MeOH and gas phase were explored using the TD-DFT and CPCM solvent model technique with the 6-311++G(d,p) basis set in order to better understand the electronic characteristics. Mulliken population analyses as well as condensed Fukui functions were presented. The same approach was used to determine the dipole moment ( $\mu$ ), linear polarizability ( $\alpha$ ) and first order hyperpolarizability ( $\beta$ ) in the NLO investigation. The SwissADME Tool [25] was used to determine the drug-likeness and ADME features of the compound. Molecular docking investigation was carried out using the Autodock 4.2.6 software programme [26].

**Table S1.** Optimized bond parameters of 21HBMBA in different solvents.

| Bond length (Å)     |      |      |      |      | Bond angle (°)      |        |        |        |        |
|---------------------|------|------|------|------|---------------------|--------|--------|--------|--------|
| B3LYP/6-311++G(d,p) |      |      |      |      | B3LYP/6-311++G(d,p) |        |        |        |        |
| Parameter           | Gas  | EtOH | DCM  | DMSO | Parameter           | Gas    | EtOH   | DCM    | DMSO   |
| N22 – C23           | 1.39 | 1.39 | 1.39 | 1.39 | N22 – C19 – H21     | 125.54 | 125.54 | 125.38 | 125.39 |
| N22 – C19           | 1.30 | 1.30 | 1.31 | 1.31 | N22 – C19 – N17     | 119.72 | 114.10 | 114.11 | 114.11 |
| C19 – N17           | 1.39 | 1.39 | 1.37 | 1.37 | C19 – N17 – C20     | 105.86 | 105.86 | 106.10 | 106.09 |
| N17 – C20           | 1.39 | 1.39 | 1.38 | 1.38 | C20 – C23 – N22     | 110.22 | 110.22 | 109.98 | 109.99 |
| C20 – C23           | 1.41 | 1.41 | 1.41 | 1.41 | C23 – C25 – H28     | 120.14 | 120.14 | 120.53 | 120.51 |
| C20 – C24           | 1.39 | 1.39 | 1.39 | 1.39 | C23 – C25 – C29     | 118.12 | 118.12 | 118.05 | 118.05 |
| C26 – C29           | 1.40 | 1.40 | 1.40 | 1.40 | C25 – C29 – H31     | 119.64 | 119.64 | 119.61 | 119.61 |
| N17 – C11           | 1.46 | 1.46 | 1.46 | 1.46 | C29 – C26 – C24     | 121.56 | 121.56 | 121.60 | 121.60 |
| C11 – C6            | 1.52 | 1.52 | 1.52 | 1.52 | C24 – C20 – N17     | 133.05 | 133.05 | 132.96 | 132.96 |
| C6 – C2             | 1.41 | 1.41 | 1.41 | 1.41 | C20 – N17 – C11     | 127.64 | 127.64 | 127.84 | 127.84 |
| C2 – C1             | 1.49 | 1.49 | 1.49 | 1.49 | N17 – C11 – C6      | 114.46 | 114.46 | 114.39 | 114.40 |
| C1 – O3             | 1.35 | 1.35 | 1.34 | 1.34 | C19 – N17 – C11     | 126.21 | 126.21 | 125.84 | 125.85 |
| O3 – H7             | 0.96 | 0.96 | 0.97 | 0.97 | C11 – C6 – C2       | 124.04 | 124.02 | 124.13 | 124.12 |
| C1 – O4             | 1.21 | 1.21 | 1.21 | 1.21 | C2 – C1 – O4        | 125.76 | 125.76 | 125.42 | 125.43 |
| C2 – C5             | 1.40 | 1.40 | 1.40 | 1.40 | C2 – C1 – O3        | 112.81 | 112.81 | 112.83 | 112.83 |
| C13 – C9            | 1.39 | 1.39 | 1.39 | 1.39 | C1 – O3 – H7        | 106.72 | 106.72 | 107.82 | 107.79 |
| C13 – C10           | 1.39 | 1.39 | 1.39 | 1.39 | O3 – C1 – O4        | 121.40 | 121.40 | 121.72 | 121.71 |
| C10 – H14           | 1.08 | 1.08 | 1.08 | 1.08 | C1 – C2 – C5        | 118.41 | 118.41 | 118.26 | 118.27 |

**Table S2.** Calculated vibrational frequencies (cm<sup>-1</sup>) assignments of 21HBMBA based on B3LYP/6311++G(d,p)basis set.

| Mode no | Experimental wave number (cm <sup>-1</sup> ) | Theoretical wave number (cm <sup>-1</sup> ) |        | I <sub>IR</sub> <sup>c</sup> | I <sub>IRAMAN</sub> <sup>d</sup> | Assignments (PED) <sup>a,b</sup> |
|---------|----------------------------------------------|---------------------------------------------|--------|------------------------------|----------------------------------|----------------------------------|
|         | FTIR                                         | Unscaled                                    | Scaled |                              |                                  |                                  |
| 87      | 3435                                         | 3766                                        | 3619   | 33                           | 65                               | γ OH(100)                        |
| 86      | -                                            | 3250                                        | 3123   | 0                            | 33                               | γ CH(25)                         |
| 85      | -                                            | 3215                                        | 3089   | 1                            | 63                               | γ CH(43)                         |
| 84      | -                                            | 3201                                        | 3077   | 3                            | 86                               | γ CH(49)                         |
| 83      | -                                            | 3193                                        | 3068   | 6                            | 74                               | γ CH(36)                         |

|    |      |      |      |     |     |                                                                                   |
|----|------|------|------|-----|-----|-----------------------------------------------------------------------------------|
| 82 | -    | 3192 | 3067 | 3   | 100 | $\gamma\text{CH}(47)$                                                             |
| 81 | -    | 3178 | 3055 | 4   | 60  | $\gamma\text{CH}(60)$                                                             |
| 80 | -    | 3178 | 3054 | 2   | 41  | $\gamma\text{CH}(24)$                                                             |
| 79 | -    | 3166 | 3042 | 1   | 32  | $\gamma\text{CH}(44)$                                                             |
| 78 | -    | 3162 | 3039 | 2   | 25  | $\gamma\text{CH}(57)$                                                             |
| 77 | 2919 | 3131 | 3009 | 0   | 26  | $\gamma\text{CH}(75)$                                                             |
| 76 | 2858 | 3045 | 2927 | 10  | 56  | $\gamma\text{CH}(75)$                                                             |
| 75 | 2413 | 1777 | 1708 | 100 | 26  | $\gamma\text{OC}(83)$                                                             |
| 74 | 1649 | 1652 | 1588 | 7   | 3   | $\gamma\text{CC}(34)$                                                             |
| 73 | -    | 1640 | 1576 | 3   | 23  | $\gamma\text{CC}(42)+\beta\text{HCC}(21)$                                         |
| 72 | -    | 1618 | 1555 | 1   | 10  | $\gamma\text{CC}(14)+\beta\text{CCC}(13)+\beta\text{CCN}(12)+\beta\text{CNC}(13)$ |
| 71 | 1504 | 1616 | 1553 | 4   | 9   | $\gamma\text{CC}(22)+\beta\text{CCC}(10)$                                         |
| 70 | -    | 1530 | 1470 | 26  | 19  | $\gamma\text{NC}(48)+\beta\text{HCN}(18)$                                         |
| 69 | -    | 1521 | 1462 | 2   | 3   | $\beta\text{HCC}(40)+\beta\text{CCC}(19)$                                         |
| 68 | -    | 1512 | 1453 | 0   | 3   | $\gamma\text{CC}(18)+\beta\text{HCC}(12)$                                         |
| 67 | -    | 1486 | 1428 | 9   | 6   | $\beta\text{HCH}(31)+\beta\text{HCC}(12)+\tau\text{HCCC}(16)$                     |
| 66 | -    | 1479 | 1421 | 7   | 1   | $\gamma\text{CC}(13)+\beta\text{HCC}(28)$                                         |
| 65 | 1401 | 1475 | 1417 | 10  | 3   | $\beta\text{HCC}(16)+\beta\text{HCH}(20)$                                         |
| 64 | -    | 1413 | 1358 | 4   | 4   | $\beta\text{HCH}(19)+\beta\text{HCC}(13)+\tau\text{HCCC}(15)$                     |
| 63 | -    | 1389 | 1335 | 2   | 13  | $\gamma\text{NC}(11)+\beta\text{HCC}(28)$                                         |

|    |      |      |      |    |    |                                                                                         |
|----|------|------|------|----|----|-----------------------------------------------------------------------------------------|
| 62 | -    | 1381 | 1327 | 16 | 10 | $\gamma\text{NC}(17) + \tau\text{HCCC}(27)$                                             |
| 61 | -    | 1363 | 1310 | 28 | 4  | $\gamma\text{OC}(17) + \gamma\text{CC}(15) + \beta\text{HOC}(33) + \beta\text{OCO}(12)$ |
| 60 | 1308 | 1359 | 1306 | 3  | 2  | $\gamma\text{NC}(11) + \gamma\text{CC}(15)$                                             |
| 59 | -    | 1330 | 1279 | 2  | 2  | $\gamma\text{CC}(36)$                                                                   |
| 58 | -    | 1316 | 1264 | 2  | 1  | $\beta\text{HCC}(26)$                                                                   |
| 57 | -    | 1306 | 1255 | 18 | 29 | $\gamma\text{NC}(19) + \beta\text{HCN}(11) + \beta\text{HCC}(15)$                       |
| 56 | 1235 | 1288 | 1238 | 7  | 5  | $\beta\text{HCN}(15) + \beta\text{HCC}(17)$                                             |
| 55 | 1174 | 1224 | 1176 | 10 | 3  | $\gamma\text{NC}(17) + \beta\text{HCN}(36)$                                             |
| 54 | -    | 1211 | 1164 | 3  | 11 | $\gamma\text{CC}(27) + \beta\text{HCC}(10)$                                             |
| 53 | -    | 1202 | 1155 | 64 | 5  | $\gamma\text{CC}(16) + \beta\text{HOC}(38)$                                             |
| 52 | -    | 1194 | 1148 | 11 | 7  | $\gamma\text{CC}(17) + \beta\text{HCC}(16)$                                             |
| 51 | -    | 1190 | 1144 | 6  | 3  | $\beta\text{HCC}(58)$                                                                   |
| 50 | -    | 1175 | 1130 | 1  | 1  | $\beta\text{HCC}(44)$                                                                   |
| 49 | 1112 | 1155 | 1110 | 17 | 17 | $\gamma\text{CC}(13) + \gamma\text{OC}(11) + \beta\text{HCC}(23)$                       |
| 48 | -    | 1135 | 1090 | 5  | 2  | $\gamma\text{CC}(14) + \beta\text{HCC}(33)$                                             |
| 47 | -    | 1099 | 1056 | 1  | 1  | $\gamma\text{NC}(16) + \beta\text{CCC}(11) + \beta\text{NCN}(22)$                       |
| 46 | -    | 1081 | 1039 | 34 | 1  | $\gamma\text{OC}(34) + \beta\text{CCC}(13)$                                             |
| 45 | -    | 1072 | 1030 | 3  | 20 | $\gamma\text{CC}(34) + \beta\text{HCC}(16)$                                             |
| 44 | -    | 1030 | 990  | 3  | 13 | $\beta\text{HCC}(11) + \beta\text{CCC}(12) + \beta\text{CCN}(18) + \beta\text{CNC}(10)$ |

|    |     |      |     |    |    |                                                      |
|----|-----|------|-----|----|----|------------------------------------------------------|
| 43 | -   | 1010 | 970 | 0  | 0  | $\tau$ HCCC(69)+ $\tau$ CCCC(10)                     |
| 42 | -   | 985  | 947 | 0  | 0  | $\tau$ HCCC(75)                                      |
| 41 | -   | 973  | 935 | 0  | 0  | $\tau$ HCCC(46)+ $\tau$ CCCC(16)                     |
| 40 | -   | 957  | 920 | 3  | 1  | $\beta$ HCC(17)+ $\tau$ HCCC(36)                     |
| 39 | -   | 938  | 901 | 1  | 0  | $\tau$ HCNC(29)+ $\tau$ HCCC(32)                     |
| 38 | -   | 906  | 871 | 1  | 0  | $\tau$ HCCC(69)                                      |
| 37 | -   | 895  | 860 | 1  | 1  | $\gamma$ NC(13)+ $\beta$ CCC(24)+ $\beta$ CNC(14)    |
| 36 | -   | 878  | 844 | 4  | 0  | $\tau$ HCNC(46)                                      |
| 35 | -   | 853  | 819 | 1  | 0  | $\gamma$ CC(13)+ $\beta$ CCC(21)+ $\tau$ HCCC(12)    |
| 34 | -   | 852  | 819 | 0  | 0  | $\tau$ HCNC(15)+ $\tau$ HCCC(31)                     |
| 33 | -   | 819  | 787 | 0  | 0  | $\tau$ HCCC(10)                                      |
| 32 | -   | 800  | 768 | 0  | 3  | $\beta$ CNC(12)+ $\tau$ HCCC(15)                     |
| 31 | -   | 786  | 756 | 6  | 13 | $\beta$ CNC(11)+ $\tau$ HCCC(16)                     |
| 30 | 740 | 774  | 744 | 1  | 0  | $\tau$ HCNC(14)+ $\tau$ CCCC(18)+<br>$\tau$ CNCN(30) |
| 29 | -   | 754  | 725 | 19 | 3  | $\tau$ HCCC(19)                                      |
| 28 | -   | 748  | 719 | 24 | 0  | $\tau$ HCNC(34)+ $\tau$ HCCC(32)                     |
| 27 | -   | 734  | 706 | 21 | 8  | $\tau$ HCCC(21)                                      |
| 26 | -   | 718  | 690 | 0  | 3  | $\tau$ CCCC(10)                                      |
| 25 | -   | 649  | 624 | 13 | 1  | $\beta$ OCO(43)+ $\beta$ CCC(10)                     |
| 24 | -   | 642  | 617 | 1  | 1  | $\tau$ CNCN(15)                                      |

|    |     |     |     |    |   |                                                                     |
|----|-----|-----|-----|----|---|---------------------------------------------------------------------|
| 23 | -   | 625 | 601 | 1  | 2 | $\tau\text{CNCN}(22)$                                               |
| 22 | -   | 599 | 576 | 23 | 1 | $\tau\text{HOCC}(67)$                                               |
| 21 | -   | 593 | 570 | 2  | 2 | $\beta\text{CCC}(11)+\tau\text{HOCC}(17)$                           |
| 20 | -   | 582 | 560 | 1  | 1 | $\tau\text{CCCC}(13)+\tau\text{CNCN}(13)$                           |
| 19 | 523 | 554 | 532 | 0  | 2 | $\beta\text{CCC}(14)$                                               |
| 18 | -   | 531 | 511 | 2  | 1 | $\beta\text{OCC}(26)+\tau\text{CCCC}(10)$                           |
| 17 | 461 | 489 | 470 | 2  | 0 | $\beta\text{CCN}(20)+\beta\text{CNC}(19)$                           |
| 16 | 420 | 458 | 440 | 2  | 2 | $\beta\text{CCC}(11)+\beta\text{OCC}(11)+\tau\text{CCCC}(10)$       |
| 15 | -   | 430 | 413 | 2  | 0 | $\tau\text{CCCC}(23)$                                               |
| 14 | -   | 427 | 410 | 2  | 0 | $\tau\text{CCCC}(13)$                                               |
| 13 | -   | 401 | 385 | 1  | 2 | $\gamma\text{CC}(21)+\beta\text{OCO}(12)+\beta\text{CCC}(12)$       |
| 12 | -   | 346 | 333 | 2  | 0 | $\beta\text{CCC}(24)+\beta\text{CCC}(12)$                           |
| 11 | -   | 308 | 296 | 0  | 0 | $\beta\text{CCN}(11)$                                               |
| 10 | -   | 258 | 248 | 1  | 0 | $\beta\text{OCC}(21)+\beta\text{CCC}(30)$                           |
| 9  | -   | 244 | 235 | 1  | 1 | $\beta\text{CCC}(20)+\tau\text{CNCN}(12)$                           |
| 8  | -   | 232 | 223 | 1  | 0 | $\tau\text{CCCC}(28)+\tau\text{CNCN}(14)$                           |
| 7  | -   | 176 | 169 | 1  | 1 | $\beta\text{CNC}(26)+\tau\text{CCCC}(11)$                           |
| 6  | -   | 139 | 133 | 0  | 2 | $\beta\text{CNC}(10)$                                               |
| 5  | -   | 123 | 118 | 0  | 1 | $\tau\text{CCCC}(24)+\tau\text{OCCC}(10)$                           |
| 4  | -   | 85  | 82  | 1  | 1 | $\tau\text{CCCC}(15)+\tau\text{OCCC}(32)+$<br>$\tau\text{CCNC}(22)$ |

|   |   |    |    |   |   |                                                      |
|---|---|----|----|---|---|------------------------------------------------------|
| 3 | - | 50 | 48 | 0 | 2 | $\tau$ CCCC(14)+ $\tau$ OCCC(27)+<br>$\tau$ CCNC(10) |
| 2 | - | 41 | 39 | 0 | 3 | $\tau$ OCCC(22)+ $\tau$ CCNC(12)                     |
| 1 | - | 19 | 18 | 0 | 3 | $\tau$ CCCC(32)+ $\tau$ CCNC(36)                     |

<sup>a</sup>  $\gamma$ -stretching,  $\gamma$  $\alpha$ -Symmetrical stretching,  $\gamma$  $\alpha$ s-asymmetrical stretching,  $\beta$ -bending,  $\tau$ -torsion, vs-very strong, s-strong, m-medium, w-weak. <sup>b</sup> scaling factor: 0.961 for B3LYP/6-311++ G(d,p). <sup>c</sup>Relative absorption intensities normalized with highest peak absorption equal to 100. <sup>d</sup> Relative Raman intensities normalized to 100.

**Table S3.** Second order perturbation theory of the Fock matrix NBO analysis of 21HBMBA.

| DONOR     | TYPE  | ED/e    | ACCEPTOR  | TYPE    | ED/e    | E(2)<br>kcal/mol | E(j)-E(i)<br>a.u. | F(i,j)<br>a.u. |
|-----------|-------|---------|-----------|---------|---------|------------------|-------------------|----------------|
| C2 – C5   | $\pi$ | 1.64369 | C1 – O4   | $\pi^*$ | 0.02061 | 20.80            | 0.27              | 0.068          |
|           |       |         | C6 – C10  | $\pi^*$ | 0.02031 | 21.10            | 0.29              | 0.070          |
|           |       |         | C9 – C13  | $\pi^*$ | 0.01631 | 17.91            | 0.28              | 0.064          |
| C6 – C10  | $\pi$ | 1.97405 | C2 – C5   | $\pi^*$ | 0.02111 | 18.52            | 0.28              | 0.065          |
|           |       |         | C9 – C13  | $\pi^*$ | 0.31266 | 21.22            | 0.28              | 0.070          |
| C9 – C13  | $\pi$ | 1.97959 | C2 – C5   | $\pi^*$ | 0.35671 | 23.14            | 0.28              | 0.072          |
|           |       |         | C6 – C10  | $\pi^*$ | 0.31620 | 18.88            | 0.29              | 0.066          |
| C19 – N22 | $\pi$ | 1.98297 | C20 – C23 | $\pi^*$ | 0.03706 | 18.57            | 0.34              | 0.078          |
| C20 – C23 | $\pi$ | 1.96442 | C19 – N22 | $\pi^*$ | 0.31525 | 14.09            | 0.26              | 0.055          |
|           |       |         | C24 – C26 | $\pi^*$ | 0.01406 | 19.37            | 0.28              | 0.067          |
|           |       |         | C25 – C29 | $\pi^*$ | 0.01316 | 18.69            | 0.29              | 0.067          |
| C24 – C26 | $\pi$ | 1.97503 | C20 – C23 | $\pi^*$ | 0.47362 | 19.26            | 0.28              | 0.069          |
|           |       |         | C25 – C29 | $\pi^*$ | 0.31141 | 17.22            | 0.29              | 0.064          |
| C25 – C29 | $\pi$ | 1.97688 | C20 – C23 | $\pi^*$ | 0.47362 | 18.35            | 0.28              | 0.067          |
|           |       |         | C24 – C26 | $\pi^*$ | 0.34111 | 20.25            | 0.28              | 0.068          |
| O3        | LP(1) | 1.97733 | C1 – O4   | $\pi^*$ | 0.24500 | 6.41             | 1.23              | 0.079          |
|           | LP(2) | 1.82430 | C1 – O4   | $\pi^*$ | 0.02061 | 42.69            | 0.35              | 0.111          |

|     |       |         |           |         |         |       |      |       |
|-----|-------|---------|-----------|---------|---------|-------|------|-------|
| O4  | LP(1) | 1.97775 | C1 – C2   | $\pi^*$ | 0.06392 | 2.53  | 1.12 | 0.048 |
|     |       |         | C1 – O3   | $\pi^*$ | 0.09384 | 1.13  | 1.04 | 0.031 |
| O4  | LP(2) | 1.85275 | C1 – C2   | $\pi^*$ | 0.06392 | 16.74 | 0.69 | 0.098 |
|     |       |         | C1 – O3   | $\pi^*$ | 0.09384 | 32.54 | 0.61 | 0.128 |
| N17 | LP(1) | 1.59999 | C6 – C10  | $\pi^*$ | 0.02031 | 1.10  | 0.27 | 0.016 |
|     |       |         | C6 – C11  | $\pi^*$ | 0.02881 | 5.00  | 0.64 | 0.056 |
|     |       |         | C11 – H15 | $\pi^*$ | 0.01914 | 4.54  | 0.64 | 0.053 |
|     |       |         | C19 – N22 | $\pi^*$ | 0.00647 | 44.62 | 0.28 | 0.102 |
|     |       |         | C20- C23  | $\pi^*$ | 0.03706 | 32.25 | 0.30 | 0.089 |
| N22 | LP(1) | 1.92210 | C11 – N17 | $\pi^*$ | 0.03424 | 0.61  | 0.68 | 0.018 |
|     |       |         | N17 – C19 | $\pi^*$ | 0.04143 | 8.03  | 0.79 | 0.072 |
|     |       |         | C19 – H21 | $\pi^*$ | 0.02102 | 1.99  | 0.78 | 0.036 |
|     |       |         | C20 – C23 | $\pi^*$ | 0.03706 | 5.92  | 0.90 | 0.066 |
|     |       |         | C23 – C25 | $\pi^*$ | 0.02285 | 0.51  | 0.94 | 0.020 |

**Table S4.** Hybrid, Polarization coefficient and Atomic Orbital contribution in selected Natural Bond Orbitals of 21HBMBA.

| Bond Orbital | Hybrid A ( $h_A$ )  | Atomic Orbital (%)             | Polarization Coefficient ( $C_A$ ) | Hybrid B ( $h_B$ )  | Atomic Orbital (%)          | Polarization Coefficient ( $C_B$ ) |
|--------------|---------------------|--------------------------------|------------------------------------|---------------------|-----------------------------|------------------------------------|
| C1 - C2      | Sp <sup>1.55</sup>  | s(39.91%)p(60.75%)d(0.04%)     | 0.6959                             | Sp <sup>2.45</sup>  | s(28.94%)p(71.01%)d(0.05%)  | 0.7182                             |
| C1 - O3      | Sp <sup>2.71</sup>  | s(26.89%)p(72.89%)d(0.22%)     | 0.5657                             | Sp <sup>1.99</sup>  | s(33.37%)p(66.54%)d(0.09%)  | 0.8246                             |
| C1 - O4      | Sp <sup>1.98</sup>  | s(33.51%)p(66.33%)d (0.16%)    | 0.5925                             | Sp <sup>1.48</sup>  | s(40.27%)p(59.60%)d (0.13%) | 0.8056                             |
| C1–O4        | Sp <sup>99.99</sup> | s(0.27%)p (99.24%)d(0.49%)     | 0.5421                             | Sp <sup>99.99</sup> | s(0.37%)p(99.51%)d (0.12%)  | 0.8403                             |
| O3 – H7      | Sp <sup>3.67</sup>  | s(21.39%)p(78.52%)d (0.09%)    | 0.8652                             | S                   | s(99.88%)p(0.12%)           | 0.5014                             |
| C10 – H14    | Sp <sup>2.55</sup>  | s(28.14%)p ( 71.81%)d ( 0.05%) | 0.7776                             | S                   | s(99.95%)p(0.05%)           | 0.6287                             |
| C11 – N17    | Sp <sup>3.39</sup>  | s(22.74%)p ( 77.12%)d ( 0.14%) | 0.6056                             | Sp <sup>1.98</sup>  | s(33.61%)p(66.37%)d(0.02%)  | 0.7958                             |
| N17– C19     | Sp <sup>2.07</sup>  | s(32.60%)p ( 67.35%)d ( 0.04%) | 0.8023                             | Sp <sup>2.33</sup>  | s(30.01%)p(69.87%)d(0.12%)  | 0.5969                             |
| N17– C20     | Sp <sup>1.98</sup>  | s(33.59%)p(66.37%)d (          | 0.7914                             | Sp <sup>2.72</sup>  | s(26.86%)p(73.04%)d (       | 0.6113                             |



|            |                     |                                |        |                    |                                 |        |
|------------|---------------------|--------------------------------|--------|--------------------|---------------------------------|--------|
|            |                     | 0.04%)                         |        |                    | 0.10%)                          |        |
| C19 – N22  | Sp <sup>1.82</sup>  | s(35.48%)p ( 64.43%)d ( 0.09%) | 0.6445 | Sp <sup>1.86</sup> | s(34.94%)p ( 64.95%) d ( 0.10%) | 0.7646 |
| C19 – N22  | Sp <sup>1.00</sup>  | s(0.00%)p (99.78%)d ( 0.22%)   | 0.6331 | Sp <sup>1.00</sup> | s( 0.00%)p (99.82%) d ( 0.18%)  | 0.7741 |
| N22–C23    | Sp <sup>2.15</sup>  | s(31.67%)p (68.24%)d ( 0.09%)  | 0.7602 | Sp <sup>2.42</sup> | s(29.20%)p ( 70.71%)d(0.09%)    | 0.6496 |
| LP (1) O3  | Sp <sup>1.21</sup>  | s(45.23%)p ( 54.73%)d ( 0.03%) | ---    | ---                | ---                             | ---    |
| LP (2) O3  | Sp <sup>1</sup>     | s( 0.00%)p ( 99.94%)d ( 0.06%) | ---    | ---                | ---                             | ---    |
| LP (1) O4  | Sp <sup>0.68</sup>  | s(59.39%)p (40.59%)d ( 0.02%)  | ---    | ---                | ---                             | ---    |
| LP (2) O4  | Sp <sup>99.99</sup> | s(0.03%)p (99.89%)d ( 0.08%)   | ---    | ---                | ---                             | ---    |
| LP (1) N17 | Sp <sup>99.99</sup> | s(0.15%)p( 99.84%)d( 0.01%)    | ---    | ---                | ---                             | ---    |
| LP (1) N22 | Sp <sup>1.98</sup>  | s(33.55%)p ( 66.37%)d ( 0.08%) | ---    | ---                | ---                             | ---    |

**Table S5.** Natural Hybrid Orbital directionality and bond bending (deviations from line of nuclear centers) of 21HBMBA.

| Bond Orbital | Deviation angle (°) |          | Line of centers |               |
|--------------|---------------------|----------|-----------------|---------------|
|              | Hybrid A            | Hybrid B | Polar (Θ)       | Azimuthal (Φ) |
| σ C1 - C2    | 1.9                 | 1.7      | 83.1            | 92.1          |
| σ C1 – O3    | 3.9                 | 1.4      | 151.5           | 218.6         |
| σ C1 – O4    | 7.7                 | 7.3      | 47.8            | 297.2         |
| σ C1 – O4    | 85.4                | 85.9     | 47.8            | 297.2         |
| σ C2 – C5    | 1.6                 | 1.6      | 123.2           | 141.4         |
| σ C2 – C5    | 88.3                | 88.7     | 123.2           | 141.4         |
| σ C2 – C6    | 1.9                 | 2.4      | 46.7            | 39.9          |
| σ O3 – H7    | 3.3                 | -        | 90.7            | 273.1         |
| σ C5 – C9    | 1.5                 | 1.3      | 81.8            | 97.2          |
| σ C6 – C10   | -                   | 1.2      | 82.5            | 98.1          |
| σ C6 – C10   | 89.1                | 89.4     | 82.5            | 98.1          |

|                    |      |      |       |       |
|--------------------|------|------|-------|-------|
| $\sigma$ C6 – C11  | 2.4  | 3.7  | 56.2  | 327.0 |
| $\sigma$ C9 – C13  | 89.9 | 90.0 | 45.6  | 40.8  |
| $\sigma$ C10 – C13 | 1.1  | 1.4  | 122.6 | 142.3 |
| $\sigma$ C10 – H14 | 1.1  | -    | 46.4  | 41.2  |
| $\sigma$ C11 – H15 | 2.0  |      | 44.8  | 64.8  |
| $\sigma$ C11 – N17 | 2.3  |      | 120.7 | 339.3 |
| $\sigma$ N17 – C19 | 5.3  |      | 95.6  | 288.5 |
| $\sigma$ N17 – C20 | 6.8  | 6.2  | 115.6 | 39.1  |
| $\sigma$ C19 – N22 | -    | 5.3  | 119.1 | 353.9 |
| $\sigma$ C19 – N22 | 90.0 | 89.8 | 119.1 | 353.9 |
| $\sigma$ C20 – C23 | 3.2  | 1.0  | 109.1 | 316.6 |
| $\sigma$ C20 – C23 | 90.3 | 90.3 | 109.1 | 316.6 |
| $\sigma$ C20 – C24 | 4.7  | 2.4  | 96.6  | 84.1  |
| $\sigma$ N22 – C23 | 5.9  | 1.6  | 103.0 | 74.0  |
| $\sigma$ C23 – C25 | 2.4  | -    | 118.5 | 22.4  |
| $\sigma$ C24 – C26 | -    | 1.9  | 118.4 | 21.3  |
| $\sigma$ C24 – C26 | 90.5 | 90.1 | 118.4 | 21.3  |
| $\sigma$ C24 – H27 | 1.4  | -    | 70.5  | 136.4 |
| $\sigma$ C25 – C29 | -    | 1.8  | 96.8  | 84.0  |
| $\sigma$ C25 – C29 | 89.8 | 89.9 | 96.8  | 84.0  |
| $\sigma$ C26 – C29 | 1.9  | 1.7  | 110.3 | 317.0 |

**Table S6.** Comparison of electronic properties of 21HBMBA optimized in different solvents calculated by TD-DFT/B3LYP method.

|         | TD/DFT                   |                     |          |                        |              |
|---------|--------------------------|---------------------|----------|------------------------|--------------|
| Solvent | $\lambda_{\max}$<br>(nm) | Band Energy<br>(eV) | Energy   | Oscillator<br>Strength | Assignments  |
| Ethanol | 315.20                   | 3.9335              | 31725.8  | 0.0009                 | H→L (95.3%)  |
|         | 307.02                   | 4.0383              | 32571.07 | 0.0006                 | H-1→L(95.4%) |
|         | 260.73                   | 4.7553              | 38354.06 | 0.0438                 | H-2→L(71.5%) |
| DCM     | 318.97                   | 3.8870              | 31350.75 | 0.0008                 | H→L (95.4%)  |
|         | 310.71                   | 3.9903              | 32183.92 | 0.0005                 | H-1→L(95.5%) |
|         | 260.71                   | 4.7556              | 38356.48 | 0.0393                 | H-2→L(66.7%) |
| DMSO    | 313.76                   | 3.9516              | 31871.79 | 0.0008                 | H→L (94.9%)  |
|         | 305.73                   | 4.0554              | 32708.99 | 0.0006                 | H-1→L(95%)   |
|         | 260.83                   | 4.7535              | 38339.54 | 0.0450                 | H-2→L(73%)   |
|         |                          |                     |          |                        |              |

**Table S7.** Energy of 21HBMBA in different solvents.

| solvent | Energy (a.u)  |
|---------|---------------|
| DCM     | -839.03772044 |
| DMSO    | -839.04001079 |
| EtOH    | -839.03950497 |

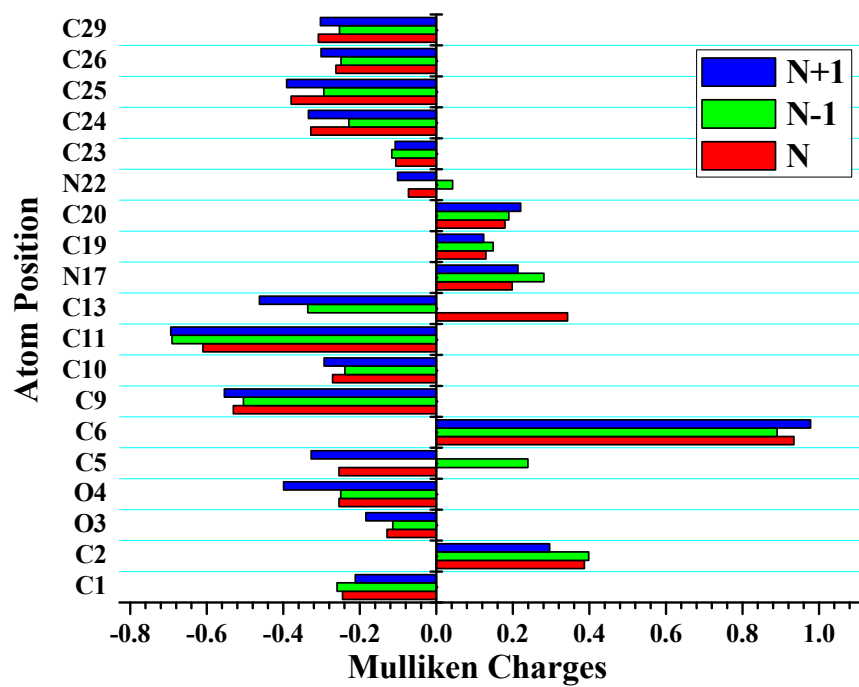

Figure S1. The histogram of calculated Mulliken charge of 21HBMBA.

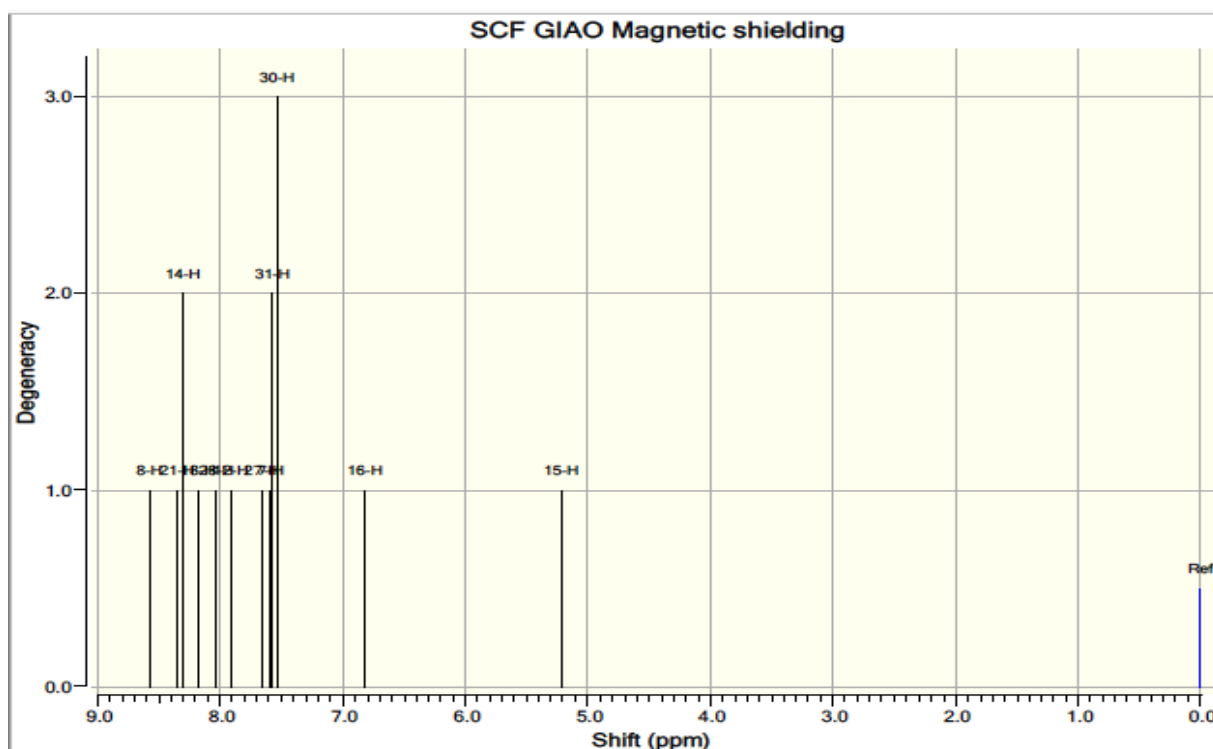

**Figure S2. (a)** Experimental  $^1\text{H}$  NMR **(b)** Theoretical  $^1\text{H}$  of 21HBMBA.

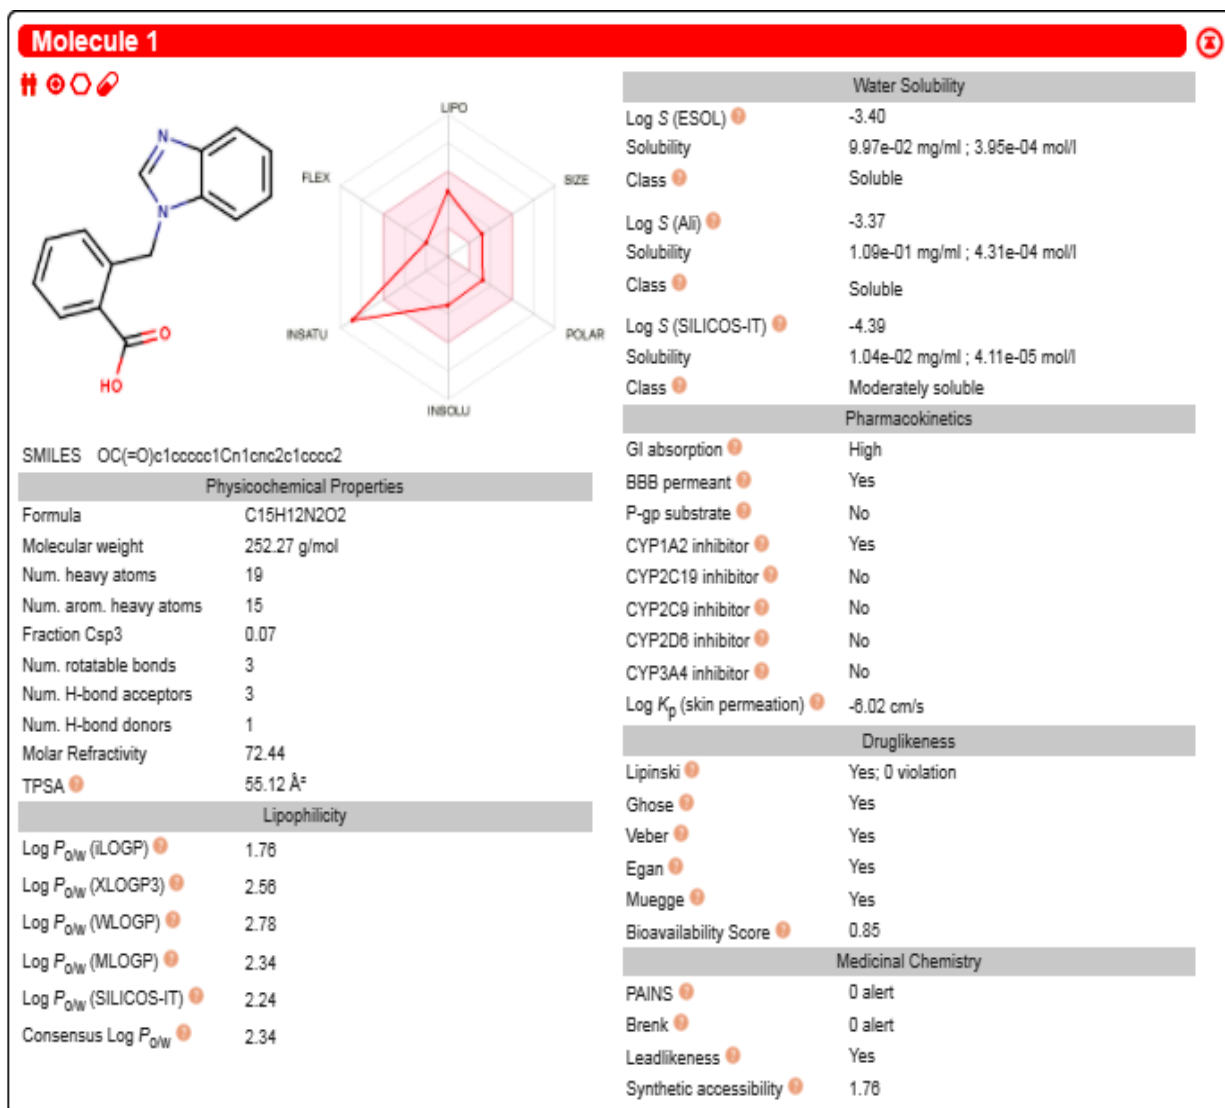

Figure S3. Drug similarity qualities of 21HBMBA.

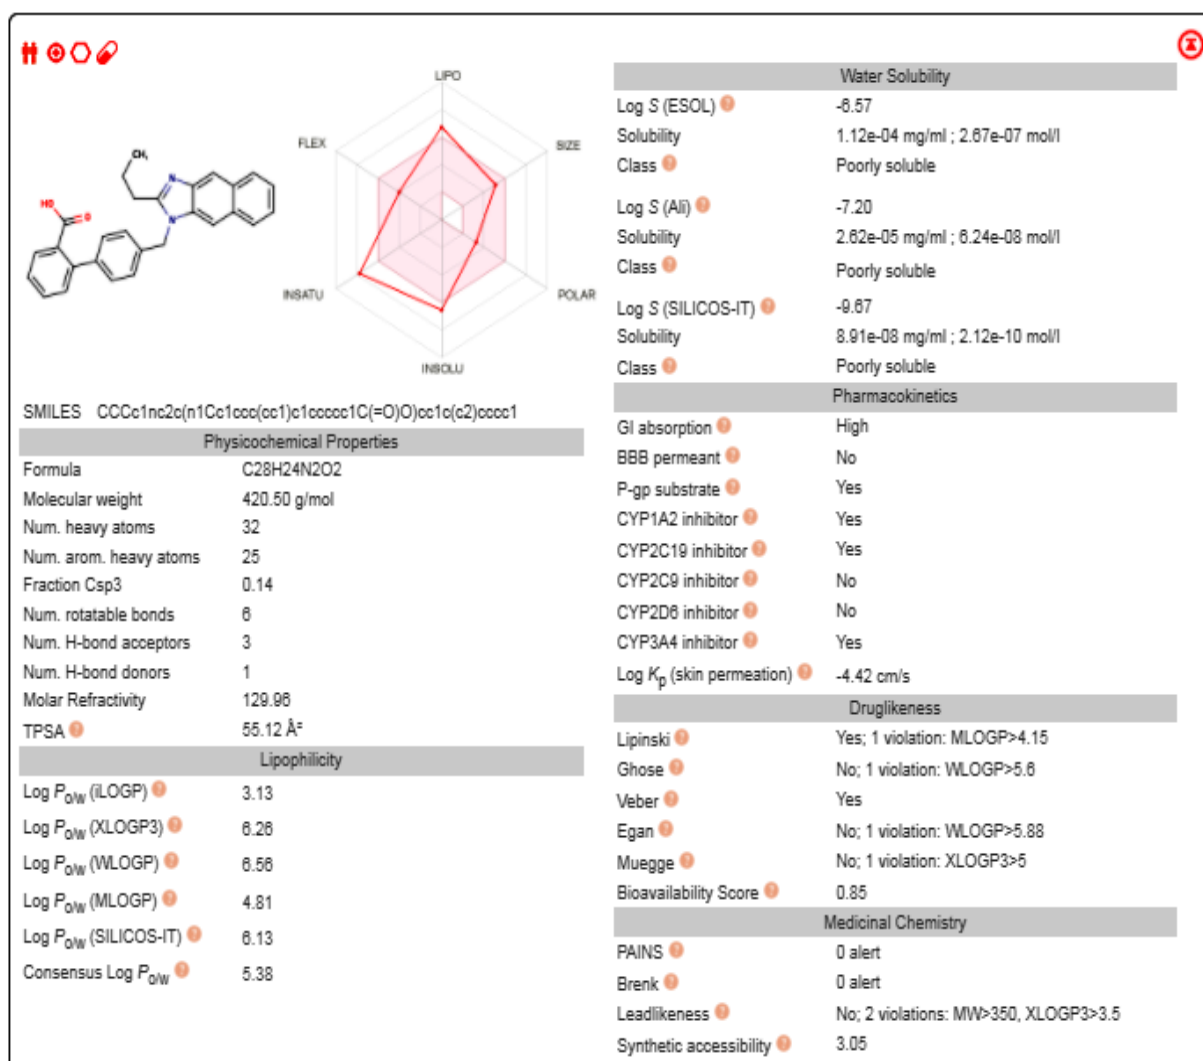

Figure S4. Drug similarity qualities of 21HBMBA derivative.
